# Supplementary material for: Classification of Sleep Quality and Aging as a Function of Brain Complexity: A Multiband Non-Linear EEG Analysis
Source: MDPI journal article supplement (doi:10.3390/s24092811), 2024-04-28
Supplement: s1 [file s1]

Supplementary Material

Accuracies reached using different machine learning methods

Young adults with good sleep quality vs older adults with bad sleep quality:

| FineTree          |       |      |       |       |       |  | MediumTree        |       |      |       |       |       |  | CoarseTree |       |      |       |       |       |  | LogisticRegression |       |      |       |       |       |
|-------------------|-------|------|-------|-------|-------|--|-------------------|-------|------|-------|-------|-------|--|------------|-------|------|-------|-------|-------|--|--------------------|-------|------|-------|-------|-------|
| Channel           | Gamma | Beta | alpha | Theta | Delta |  | Channel           | Gamma | Beta | alpha | Theta | Delta |  | Channel    | Gamma | Beta | alpha | Theta | Delta |  | Channel            | Gamma | Beta | alpha | Theta | Delta |
| Mean              | 63%   | 67%  | 73%   | 77%   | 78%   |  | Mean              | 63%   | 67%  | 73%   | 77%   | 78%   |  | Mean       | 63%   | 67%  | 73%   | 77%   | 78%   |  | Mean               | 62%   | 66%  | 72%   | 72%   | 75%   |
| Max               | 83%   | 89%  | 86%   | 89%   | 92%   |  | Max               | 83%   | 89%  | 86%   | 89%   | 92%   |  | Max        | 83%   | 89%  | 86%   | 89%   | 92%   |  | Max                | 81%   | 81%  | 89%   | 89%   | 97%   |
| MediumGuassianSVM |       |      |       |       |       |  | CoarseGuassianSVM |       |      |       |       |       |  | FineKNN    |       |      |       |       |       |  | MediumKNN          |       |      |       |       |       |
| Channel           | Gamma | Beta | alpha | Theta | Delta |  | Channel           | Gamma | Beta | alpha | Theta | Delta |  | Channel    | Gamma | Beta | alpha | Theta | Delta |  | Channel            | Gamma | Beta | alpha | Theta | Delta |
| Mean              | 69%   | 69%  | 77%   | 79%   | 86%   |  | Mean              | 69%   | 69%  | 69%   | 69%   | 69%   |  | Mean       | 55%   | 62%  | 69%   | 72%   | 80%   |  | Mean               | 70%   | 72%  | 78%   | 82%   | 86%   |
| Max               | 78%   | 83%  | 86%   | 89%   | 92%   |  | Max               | 69%   | 69%  | 69%   | 69%   | 69%   |  | Max        | 69%   | 81%  | 86%   | 86%   | 92%   |  | Max                | 75%   | 83%  | 86%   | 89%   | 92%   |
| LinearSVM         |       |      |       |       |       |  | QuadraticSVM      |       |      |       |       |       |  | CubicSVM   |       |      |       |       |       |  | FineGuassianSVM    |       |      |       |       |       |
| Channel           | Gamma | Beta | alpha | Theta | Delta |  | Channel           | Gamma | Beta | alpha | Theta | Delta |  | Channel    | Gamma | Beta | alpha | Theta | Delta |  | Channel            | Gamma | Beta | alpha | Theta | Delta |
| Mean              | 67%   | 69%  | 76%   | 79%   | 85%   |  | Mean              | 59%   | 66%  | 75%   | 79%   | 84%   |  | Mean       | 58%   | 66%  | 70%   | 76%   | 81%   |  | Mean               | 69%   | 70%  | 70%   | 72%   | 70%   |
| Max               | 78%   | 83%  | 83%   | 92%   | 89%   |  | Max               | 75%   | 83%  | 86%   | 89%   | 94%   |  | Max        | 75%   | 81%  | 83%   | 92%   | 94%   |  | Max                | 78%   | 75%  | 78%   | 81%   | 75%   |
| CoarseKNN         |       |      |       |       |       |  | CosineKNN         |       |      |       |       |       |  | CubicKNN   |       |      |       |       |       |  | WeightedKNN        |       |      |       |       |       |
| Channel           | Gamma | Beta | alpha | Theta | Delta |  | Channel           | Gamma | Beta | alpha | Theta | Delta |  | Channel    | Gamma | Beta | alpha | Theta | Delta |  | Channel            | Gamma | Beta | alpha | Theta | Delta |
| Mean              | 69%   | 69%  | 69%   | 69%   | 69%   |  | Mean              | 70%   | 73%  | 80%   | 82%   | 85%   |  | Mean       | 69%   | 72%  | 79%   | 81%   | 86%   |  | Mean               | 64%   | 68%  | 77%   | 81%   | 85%   |
| Max               | 69%   | 69%  | 69%   | 69%   | 69%   |  | Max               | 75%   | 89%  | 89%   | 89%   | 92%   |  | Max        | 78%   | 86%  | 86%   | 89%   | 92%   |  | Max                | 75%   | 83%  | 83%   | 92%   | 92%   |

Young bad vs old bad:

|         |                   |      |       |       |       |  |         |                   |      |       |       |       |  |         |            |      |       |       |       |  |         |                    |      |       |       |       |
|---------|-------------------|------|-------|-------|-------|--|---------|-------------------|------|-------|-------|-------|--|---------|------------|------|-------|-------|-------|--|---------|--------------------|------|-------|-------|-------|
|         | FineTree          |      |       |       |       |  |         | MediumTree        |      |       |       |       |  |         | CoarseTree |      |       |       |       |  |         | LogisticRegression |      |       |       |       |
| Channel | Gamma             | Beta | alpha | Theta | Delta |  | Channel | Gamma             | Beta | alpha | Theta | Delta |  | Channel | Gamma      | Beta | alpha | Theta | Delta |  | Channel | Gamma              | Beta | alpha | Theta | Delta |
| Mean    | 62%               | 65%  | 69%   | 72%   | 76%   |  | Mean    | 62%               | 65%  | 69%   | 72%   | 76%   |  | Mean    | 62%        | 65%  | 68%   | 73%   | 77%   |  | Mean    | 63%                | 66%  | 68%   | 69%   | 74%   |
| Max     | 84%               | 82%  | 87%   | 87%   | 92%   |  | Max     | 84%               | 82%  | 87%   | 87%   | 92%   |  | Max     | 84%        | 82%  | 87%   | 87%   | 92%   |  | Max     | 79%                | 76%  | 84%   | 79%   | 84%   |
|         | MediumGuassianSVM |      |       |       |       |  |         | CoarseGuassianSVM |      |       |       |       |  |         | FineKNN    |      |       |       |       |  |         | MediumKNN          |      |       |       |       |
| Channel | Gamma             | Beta | alpha | Theta | Delta |  | Channel | Gamma             | Beta | alpha | Theta | Delta |  | Channel | Gamma      | Beta | alpha | Theta | Delta |  | Channel | Gamma              | Beta | alpha | Theta | Delta |
| Mean    | 65%               | 66%  | 72%   | 72%   | 82%   |  | Mean    | 66%               | 66%  | 66%   | 66%   | 66%   |  | Mean    | 53%        | 57%  | 67%   | 70%   | 78%   |  | Mean    | 67%                | 71%  | 76%   | 77%   | 83%   |
| Max     | 74%               | 76%  | 82%   | 84%   | 89%   |  | Max     | 66%               | 68%  | 68%   | 66%   | 68%   |  | Max     | 74%        | 82%  | 82%   | 95%   | 87%   |  | Max     | 76%                | 79%  | 84%   | 87%   | 89%   |
|         | LinearSVM         |      |       |       |       |  |         | QuadraticSVM      |      |       |       |       |  |         | CubicSVM   |      |       |       |       |  |         | FineGuassianSVM    |      |       |       |       |
| Channel | Gamma             | Beta | alpha | Theta | Delta |  | Channel | Gamma             | Beta | alpha | Theta | Delta |  | Channel | Gamma      | Beta | alpha | Theta | Delta |  | Channel | Gamma              | Beta | alpha | Theta | Delta |
| Mean    | 67%               | 69%  | 74%   | 75%   | 82%   |  | Mean    | 59%               | 62%  | 68%   | 71%   | 81%   |  | Mean    | 56%        | 58%  | 69%   | 73%   | 79%   |  | Mean    | 64%                | 66%  | 66%   | 66%   | 66%   |
| Max     | 76%               | 82%  | 84%   | 87%   | 89%   |  | Max     | 84%               | 79%  | 89%   | 87%   | 92%   |  | Max     | 76%        | 79%  | 87%   | 87%   | 92%   |  | Max     | 74%                | 71%  | 74%   | 74%   | 74%   |
|         | CoarseKNN         |      |       |       |       |  |         | CosineKNN         |      |       |       |       |  |         | CubicKNN   |      |       |       |       |  |         | WeightedKNN        |      |       |       |       |
| Channel | Gamma             | Beta | alpha | Theta | Delta |  | Channel | Gamma             | Beta | alpha | Theta | Delta |  | Channel | Gamma      | Beta | alpha | Theta | Delta |  | Channel | Gamma              | Beta | alpha | Theta | Delta |
| Mean    | 66%               | 66%  | 66%   | 66%   | 66%   |  | Mean    | 68%               | 72%  | 77%   | 78%   | 83%   |  | Mean    | 67%        | 71%  | 76%   | 76%   | 82%   |  | Mean    | 61%                | 66%  | 72%   | 74%   | 82%   |
| Max     | 66%               | 66%  | 66%   | 66%   | 66%   |  | Max     | 76%               | 87%  | 87%   | 89%   | 92%   |  | Max     | 79%        | 79%  | 87%   | 89%   | 87%   |  | Max     | 79%                | 76%  | 84%   | 89%   | 89%   |

Young bad vs old good:

|         |                   |      |       |       |       |  |         |                   |      |       |       |       |  |         |            |      |       |       |       |  |         |                    |      |       |       |       |
|---------|-------------------|------|-------|-------|-------|--|---------|-------------------|------|-------|-------|-------|--|---------|------------|------|-------|-------|-------|--|---------|--------------------|------|-------|-------|-------|
|         | FineTree          |      |       |       |       |  |         | MediumTree        |      |       |       |       |  |         | CoarseTree |      |       |       |       |  |         | LogisticRegression |      |       |       |       |
| Channel | Gamma             | Beta | alpha | Theta | Delta |  | Channel | Gamma             | Beta | alpha | Theta | Delta |  | Channel | Gamma      | Beta | alpha | Theta | Delta |  | Channel | Gamma              | Beta | alpha | Theta | Delta |
| Mean    | 53%               | 60%  | 73%   | 76%   | 72%   |  | Mean    | 53%               | 60%  | 73%   | 76%   | 72%   |  | Mean    | 53%        | 60%  | 73%   | 76%   | 72%   |  | Mean    | 63%                | 63%  | 64%   | 66%   | 70%   |
| Max     | 91%               | 86%  | 95%   | 100%  | 95%   |  | Max     | 91%               | 86%  | 95%   | 100%  | 95%   |  | Max     | 91%        | 86%  | 95%   | 100%  | 95%   |  | Max     | 86%                | 82%  | 100%  | 100%  | 100%  |
|         | MediumGuassianSVM |      |       |       |       |  |         | CoarseGuassianSVM |      |       |       |       |  |         | FineKNN    |      |       |       |       |  |         | MediumKNN          |      |       |       |       |
| Channel | Gamma             | Beta | alpha | Theta | Delta |  | Channel | Gamma             | Beta | alpha | Theta | Delta |  | Channel | Gamma      | Beta | alpha | Theta | Delta |  | Channel | Gamma              | Beta | alpha | Theta | Delta |
| Mean    | 57%               | 58%  | 69%   | 78%   | 78%   |  | Mean    | 59%               | 59%  | 59%   | 59%   | 59%   |  | Mean    | 55%        | 57%  | 68%   | 68%   | 78%   |  | Mean    | 60%                | 62%  | 75%   | 79%   | 80%   |
| Max     | 68%               | 77%  | 86%   | 95%   | 95%   |  | Max     | 59%               | 59%  | 59%   | 59%   | 59%   |  | Max     | 77%        | 82%  | 91%   | 95%   | 100%  |  | Max     | 82%                | 82%  | 91%   | 91%   | 91%   |
|         | LinearSVM         |      |       |       |       |  |         | QuadraticSVM      |      |       |       |       |  |         | CubicSVM   |      |       |       |       |  |         | FineGuassianSVM    |      |       |       |       |
| Channel | Gamma             | Beta | alpha | Theta | Delta |  | Channel | Gamma             | Beta | alpha | Theta | Delta |  | Channel | Gamma      | Beta | alpha | Theta | Delta |  | Channel | Gamma              | Beta | alpha | Theta | Delta |
| Mean    | 58%               | 61%  | 69%   | 79%   | 78%   |  | Mean    | 58%               | 60%  | 66%   | 75%   | 79%   |  | Mean    | 58%        | 59%  | 67%   | 72%   | 78%   |  | Mean    | 58%                | 58%  | 61%   | 61%   | 61%   |
| Max     | 86%               | 77%  | 86%   | 100%  | 95%   |  | Max     | 77%               | 91%  | 86%   | 95%   | 100%  |  | Max     | 82%        | 91%  | 86%   | 95%   | 100%  |  | Max     | 73%                | 68%  | 68%   | 77%   | 86%   |
|         | CoarseKNN         |      |       |       |       |  |         | CosineKNN         |      |       |       |       |  |         | CubicKNN   |      |       |       |       |  |         | WeightedKNN        |      |       |       |       |
| Channel | Gamma             | Beta | alpha | Theta | Delta |  | Channel | Gamma             | Beta | alpha | Theta | Delta |  | Channel | Gamma      | Beta | alpha | Theta | Delta |  | Canais  | Gamma              | Beta | alpha | Theta | Delta |
| Mean    | 60%               | 62%  | 75%   | 79%   | 80%   |  | Mean    | 59%               | 59%  | 77%   | 83%   | 78%   |  | Mean    | 59%        | 62%  | 75%   | 77%   | 80%   |  | Mean    | 59%                | 62%  | 75%   | 77%   | 80%   |
| Max     | 82%               | 82%  | 91%   | 91%   | 91%   |  | Max     | 77%               | 77%  | 86%   | 95%   | 91%   |  | Max     | 77%        | 73%  | 91%   | 91%   | 95%   |  | Max     | 77%                | 73%  | 91%   | 91%   | 95%   |

Young good vs old good:

| FineTree          |       |      |       |       |       | MediumTree        |       |      |       |       |       | CoarseTree |       |      |       |       |       | LogisticRegression |       |      |       |       |       |
|-------------------|-------|------|-------|-------|-------|-------------------|-------|------|-------|-------|-------|------------|-------|------|-------|-------|-------|--------------------|-------|------|-------|-------|-------|
| Channel           | Gamma | Beta | alpha | Theta | Delta | Channel           | Gamma | Beta | alpha | Theta | Delta | Channel    | Gamma | Beta | alpha | Theta | Delta | Channel            | Gamma | Beta | alpha | Theta | Delta |
| Mean              | 58%   | 57%  | 66%   | 67%   | 70%   | Mean              | 58%   | 57%  | 66%   | 67%   | 70%   | Mean       | 58%   | 57%  | 66%   | 67%   | 70%   | Mean               | 58%   | 62%  | 61%   | 64%   | 65%   |
| Max               | 85%   | 85%  | 90%   | 90%   | 90%   | Max               | 85%   | 85%  | 90%   | 90%   | 90%   | Max        | 85%   | 85%  | 90%   | 90%   | 90%   | Max                | 90%   | 85%  | 85%   | 85%   | 95%   |
| MediumGaussianSVM |       |      |       |       |       | CoarseGaussianSVM |       |      |       |       |       | FineKNN    |       |      |       |       |       | MediumKNN          |       |      |       |       |       |
| Channel           | Gamma | Beta | alpha | Theta | Delta | Channel           | Gamma | Beta | alpha | Theta | Delta | Channel    | Gamma | Beta | alpha | Theta | Delta | Channel            | Gamma | Beta | alpha | Theta | Delta |
| Mean              | 58%   | 53%  | 68%   | 71%   | 76%   | Mean              | 55%   | 55%  | 55%   | 55%   | 55%   | Mean       | 50%   | 56%  | 59%   | 63%   | 72%   | Mean               | 57%   | 57%  | 72%   | 77%   | 80%   |
| Max               | 80%   | 75%  | 80%   | 90%   | 95%   | Max               | 55%   | 55%  | 55%   | 55%   | 55%   | Max        | 75%   | 85%  | 80%   | 95%   | 90%   | Max                | 75%   | 70%  | 85%   | 85%   | 90%   |
| LinearSVM         |       |      |       |       |       | QuadraticSVM      |       |      |       |       |       | CubicSVM   |       |      |       |       |       | FineGaussianSVM    |       |      |       |       |       |
| Channel           | Gamma | Beta | alpha | Theta | Delta | Channel           | Gamma | Beta | alpha | Theta | Delta | Channel    | Gamma | Beta | alpha | Theta | Delta | Channel            | Gamma | Beta | alpha | Theta | Delta |
| Mean              | 59%   | 56%  | 67%   | 70%   | 77%   | Mean              | 62%   | 60%  | 63%   | 69%   | 75%   | Mean       | 59%   | 60%  | 63%   | 70%   | 72%   | Mean               | 52%   | 50%  | 54%   | 55%   | 60%   |
| Max               | 90%   | 70%  | 90%   | 90%   | 95%   | Max               | 90%   | 85%  | 85%   | 90%   | 95%   | Max        | 85%   | 85%  | 90%   | 85%   | 90%   | Max                | 65%   | 65%  | 75%   | 75%   | 90%   |
| CoarseKNN         |       |      |       |       |       | CosineKNN         |       |      |       |       |       | CubicKNN   |       |      |       |       |       | WeightedKNN        |       |      |       |       |       |
| Channel           | Gamma | Beta | alpha | Theta | Delta | Channel           | Gamma | Beta | alpha | Theta | Delta | Channel    | Gamma | Beta | alpha | Theta | Delta | Channel            | Gamma | Beta | alpha | Theta | Delta |
| Mean              | 55%   | 55%  | 55%   | 55%   | 55%   | Mean              | 55%   | 56%  | 70%   | 77%   | 78%   | Mean       | 58%   | 56%  | 68%   | 73%   | 80%   | Mean               | 56%   | 52%  | 64%   | 73%   | 77%   |
| Max               | 55%   | 55%  | 55%   | 55%   | 55%   | Max               | 75%   | 75%  | 80%   | 85%   | 90%   | Max        | 75%   | 80%  | 80%   | 90%   | 90%   | Max                | 75%   | 75%  | 85%   | 85%   | 85%   |

Old good vs old bad:

| FineTree          |       |      |       |       |       | MediumTree        |       |      |       |       |       | CoarseTree |       |      |       |       |       | LogisticRegression |       |      |       |       |       |
|-------------------|-------|------|-------|-------|-------|-------------------|-------|------|-------|-------|-------|------------|-------|------|-------|-------|-------|--------------------|-------|------|-------|-------|-------|
| Channel           | Gamma | Beta | alpha | Theta | Delta | Channel           | Gamma | Beta | alpha | Theta | Delta | Channel    | Gamma | Beta | alpha | Theta | Delta | Channel            | Gamma | Beta | alpha | Theta | Delta |
| Mean              | 61%   | 61%  | 60%   | 63%   | 67%   | Mean              | 61%   | 61%  | 60%   | 63%   | 67%   | Mean       | 61%   | 61%  | 60%   | 63%   | 68%   | Mean               | 64%   | 63%  | 58%   | 61%   | 65%   |
| Max               | 85%   | 79%  | 85%   | 85%   | 85%   | Max               | 85%   | 79%  | 85%   | 85%   | 85%   | Max        | 85%   | 79%  | 85%   | 85%   | 85%   | Max                | 71%   | 71%  | 74%   | 71%   | 82%   |
|                   |       |      |       |       |       |                   |       |      |       |       |       |            |       |      |       |       |       |                    |       |      |       |       |       |
| MediumGaussianSVM |       |      |       |       |       | CoarseGaussianSVM |       |      |       |       |       | FineKNN    |       |      |       |       |       | MediumKNN          |       |      |       |       |       |
| Channel           | Gamma | Beta | alpha | Theta | Delta | Channel           | Gamma | Beta | alpha | Theta | Delta | Channel    | Gamma | Beta | alpha | Theta | Delta | Channel            | Gamma | Beta | alpha | Theta | Delta |
| Mean              | 74%   | 74%  | 73%   | 73%   | 73%   | Mean              | 74%   | 74%  | 74%   | 74%   | 74%   | Mean       | 64%   | 63%  | 59%   | 59%   | 62%   | Mean               | 73%   | 74%  | 73%   | 74%   | 74%   |
| Max               | 79%   | 79%  | 74%   | 74%   | 74%   | Max               | 74%   | 74%  | 74%   | 74%   | 74%   | Max        | 82%   | 82%  | 74%   | 76%   | 79%   | Max                | 76%   | 76%  | 76%   | 76%   | 79%   |
|                   |       |      |       |       |       |                   |       |      |       |       |       |            |       |      |       |       |       |                    |       |      |       |       |       |
| LinearSVM         |       |      |       |       |       | QuadraticSVM      |       |      |       |       |       | CubicSVM   |       |      |       |       |       | FineGaussianSVM    |       |      |       |       |       |
| Channel           | Gamma | Beta | alpha | Theta | Delta | Channel           | Gamma | Beta | alpha | Theta | Delta | Channel    | Gamma | Beta | alpha | Theta | Delta | Channel            | Gamma | Beta | alpha | Theta | Delta |
| Mean              | 72%   | 72%  | 72%   | 71%   | 71%   | Mean              | 68%   | 67%  | 63%   | 65%   | 67%   | Mean       | 64%   | 67%  | 60%   | 59%   | 65%   | Mean               | 74%   | 74%  | 73%   | 73%   | 73%   |
| Max               | 85%   | 82%  | 74%   | 76%   | 79%   | Max               | 85%   | 85%  | 76%   | 79%   | 85%   | Max        | 85%   | 88%  | 74%   | 79%   | 79%   | Max                | 79%   | 79%  | 74%   | 76%   | 74%   |
|                   |       |      |       |       |       |                   |       |      |       |       |       |            |       |      |       |       |       |                    |       |      |       |       |       |
| CoarseKNN         |       |      |       |       |       | CosineKNN         |       |      |       |       |       | CubicKNN   |       |      |       |       |       | WeightedKNN        |       |      |       |       |       |
| Channel           | Gamma | Beta | alpha | Theta | Delta | Channel           | Gamma | Beta | alpha | Theta | Delta | Channel    | Gamma | Beta | alpha | Theta | Delta | Channel            | Gamma | Beta | alpha | Theta | Delta |
| Mean              | 74%   | 74%  | 74%   | 74%   | 74%   | Mean              | 74%   | 73%  | 74%   | 74%   | 74%   | Mean       | 74%   | 74%  | 73%   | 73%   | 74%   | Mean               | 74%   | 74%  | 73%   | 73%   | 74%   |
| Max               | 74%   | 74%  | 74%   | 74%   | 74%   | Max               | 76%   | 74%  | 76%   | 76%   | 79%   | Max        | 74%   | 74%  | 76%   | 74%   | 79%   | Max                | 74%   | 74%  | 76%   | 74%   | 79%   |

Young good vs young bad:

| FineTree          |       |      |       |       |       | MediumTree        |       |      |       |       |       | CoarseTree |       |      |       |       |       | LogisticRegression★ |       |      |       |       |       |
|-------------------|-------|------|-------|-------|-------|-------------------|-------|------|-------|-------|-------|------------|-------|------|-------|-------|-------|---------------------|-------|------|-------|-------|-------|
| Channel           | Gamma | Beta | alpha | Theta | Delta | Channel           | Gamma | Beta | alpha | Theta | Delta | Channel    | Gamma | Beta | alpha | Theta | Delta | Channel             | Gamma | Beta | alpha | Theta | Delta |
| Mean              | 47%   | 48%  | 49%   | 53%   | 49%   | Mean              | 47%   | 48%  | 49%   | 53%   | 49%   | Mean       | 47%   | 48%  | 49%   | 53%   | 49%   | Mean                | 43%   | 50%  | 49%   | 47%   | 50%   |
| Max               | 71%   | 75%  | 71%   | 83%   | 79%   | Max               | 71%   | 75%  | 71%   | 83%   | 79%   | Max        | 71%   | 75%  | 71%   | 83%   | 79%   | Max                 | 63%   | 75%  | 88%   | 71%   | 75%   |
| MediumGuassianSVM |       |      |       |       |       | CoarseGuassianSVM |       |      |       |       |       | FineKNN    |       |      |       |       |       | MediumKNN           |       |      |       |       |       |
| Channel           | Gamma | Beta | alpha | Theta | Delta | Channel           | Gamma | Beta | alpha | Theta | Delta | Canais     | Gamma | Beta | alpha | Theta | Delta | Channel             | Gamma | Beta | alpha | Theta | Delta |
| Mean              | 50%   | 52%  | 47%   | 46%   | 48%   | Mean              | 54%   | 54%  | 54%   | 54%   | 54%   | Média      | 43%   | 48%  | 49%   | 47%   | 55%   | Mean                | 57%   | 61%  | 56%   | 56%   | 59%   |
| Max               | 63%   | 79%  | 63%   | 67%   | 58%   | Max               | 54%   | 54%  | 54%   | 54%   | 54%   | Maximo     | 67%   | 88%  | 79%   | 71%   | 75%   | Max                 | 75%   | 75%  | 75%   | 75%   | 71%   |
| LinearSVM         |       |      |       |       |       | QuadraticSVM      |       |      |       |       |       | CubicSVM   |       |      |       |       |       | FineGuassianSVM     |       |      |       |       |       |
| Channel           | Gamma | Beta | alpha | Theta | Delta | Channel           | Gamma | Beta | alpha | Theta | Delta | Canais     | Gamma | Beta | alpha | Theta | Delta | Channel             | Gamma | Beta | alpha | Theta | Delta |
| Mean              | 49%   | 53%  | 45%   | 44%   | 47%   | Mean              | 43%   | 48%  | 49%   | 52%   | 56%   | Média      | 46%   | 51%  | 49%   | 53%   | 55%   | Mean                | 48%   | 51%  | 51%   | 51%   | 51%   |
| Max               | 67%   | 75%  | 71%   | 75%   | 79%   | Max               | 71%   | 79%  | 75%   | 67%   | 75%   | Maximo     | 67%   | 79%  | 71%   | 71%   | 71%   | Max                 | 71%   | 71%  | 75%   | 71%   | 67%   |
| CoarseKNN         |       |      |       |       |       | CosineKNN         |       |      |       |       |       | CubicKNN   |       |      |       |       |       | WeightedKNN         |       |      |       |       |       |
| Channel           | Gamma | Beta | alpha | Theta | Delta | Channel           | Gamma | Beta | alpha | Theta | Delta | Channel    | Gamma | Beta | alpha | Theta | Delta | Channel             | Gamma | Beta | alpha | Theta | Delta |
| Mean              | 54%   | 54%  | 54%   | 54%   | 54%   | Mean              | 60%   | 58%  | 56%   | 54%   | 54%   | Mean       | 58%   | 61%  | 56%   | 56%   | 61%   | Mean                | 47%   | 47%  | 46%   | 47%   | 51%   |
| Max               | 54%   | 54%  | 54%   | 54%   | 54%   | Max               | 83%   | 79%  | 71%   | 71%   | 79%   | Max        | 75%   | 75%  | 75%   | 71%   | 75%   | Max                 | 67%   | 75%  | 63%   | 71%   | 67%   |

## Regions that presented higher differences

| EEG brain configuration changes in theta and delta subbands in young vs older adults                                                                                                                                                                                                                                                                                                                                                                                                                                                                                                                                                                                                                                                                                                              |          |          |          |          |
|---------------------------------------------------------------------------------------------------------------------------------------------------------------------------------------------------------------------------------------------------------------------------------------------------------------------------------------------------------------------------------------------------------------------------------------------------------------------------------------------------------------------------------------------------------------------------------------------------------------------------------------------------------------------------------------------------------------------------------------------------------------------------------------------------|----------|----------|----------|----------|
| Subband                                                                                                                                                                                                                                                                                                                                                                                                                                                                                                                                                                                                                                                                                                                                                                                           | YG vs OB | YB vs OG | YB vs OB | YG vs OG |
| Theta                                                                                                                                                                                                                                                                                                                                                                                                                                                                                                                                                                                                                                                                                                                                                                                             | D4       | C4       | B26      | D19      |
|                                                                                                                                                                                                                                                                                                                                                                                                                                                                                                                                                                                                                                                                                                                                                                                                   | B2       | B16      | A30      |          |
|                                                                                                                                                                                                                                                                                                                                                                                                                                                                                                                                                                                                                                                                                                                                                                                                   | A30      | A19      |          |          |
| Delta                                                                                                                                                                                                                                                                                                                                                                                                                                                                                                                                                                                                                                                                                                                                                                                             | B16      | C7       | B16      | D26      |
|                                                                                                                                                                                                                                                                                                                                                                                                                                                                                                                                                                                                                                                                                                                                                                                                   | A23      | A23      |          |          |
|                                                                                                                                                                                                                                                                                                                                                                                                                                                                                                                                                                                                                                                                                                                                                                                                   |          | A19      |          |          |
|                                                                                                                                                                                                                                                                                                                                                                                                                                                                                                                                                                                                                                                                                                                                                                                                   |          | A15      |          |          |
| <b>Note.</b> Table 2 displays the channels that presented higher differences between the study groups in the theta and delta subbands. YG = Young Adults with Good Sleep Quality; OB = Older Adults with Bad sleep Quality; YB = Young Adults Bad Sleep Quality; OG = Older Adults Good sleep Quality; Highlighted <i>in blue</i> the most representative channels indicating bad sleep in ageing; Channels in <i>in green</i> indicate age related changes; <i>In orange</i> the channel related to bad sleep independently of age. Only the theta and delta subbands are displayed as they are the ones that showed greater accuracy levels. (See below a biosemi plot with the biosemi EEG channels' locations). In <i>black</i> changes due to age and / or sleep (difficult to disentangle). |          |          |          |          |

| Regions most affected when comparing the older groups                                                                                                                                                                                                                              |          |
|------------------------------------------------------------------------------------------------------------------------------------------------------------------------------------------------------------------------------------------------------------------------------------|----------|
| Subband                                                                                                                                                                                                                                                                            | OG vs OB |
| Gamma                                                                                                                                                                                                                                                                              | A23      |
| Beta                                                                                                                                                                                                                                                                               | A23      |
| Alpha                                                                                                                                                                                                                                                                              | Several  |
| Theta                                                                                                                                                                                                                                                                              | A1       |
| Delta                                                                                                                                                                                                                                                                              | C29      |
|                                                                                                                                                                                                                                                                                    | C7       |
| <b>Note.</b> Table 3 displays the channels that presented higher differences between the study groups. OG = Older with Good Sleep Quality and the OB = Older with Bad Sleep Quality. In this table, all the subbands are displayed as accuracy levels are homogeneous across them. |          |
